# Supplementary material for: Albumin-Binding Domain Conjugate for Near-Infrared Fluorescence Lymphatic Imaging
Source: PubMed Central journal article supplement — Mol Imaging Biol. 2011 Jun 18;14(3):301–14. doi: 10.1007/s11307-011-0499-x (PMC3346932; doi:10.1007/s11307-011-0499-x), 2011-06-18
Supplement: 11307_2011_499_MOESM1_ESM.pdf [file 11307_2011_499_MOESM1_ESM.pdf]

Albumin Binding Domain Conjugate for Near Infrared Lymphatic Fluorescence Imaging  
Molecular Imaging and Biology

Cynthia A. Davies-Venn, Bonnie Angermiller, Nathaniel Wilganowski, Pradip Ghosh, Barrett R. Harvey, Grace Wu, Sunkuk Kwon, Melissa B. Aldrich, and Eva M. Sevick-Muraca\*

\*Corresponding Author: 1825 Pressler Street, SRB 330A, The Center for Molecular Imaging, The Brown Foundation Institute of Molecular Medicine, University of Texas Health Science Center, Houston Texas, 77030; Eva.Sevick@uth.tmc.edu

## Stability of 100 $\mu\text{g/ml}$ IC-Green in Saline

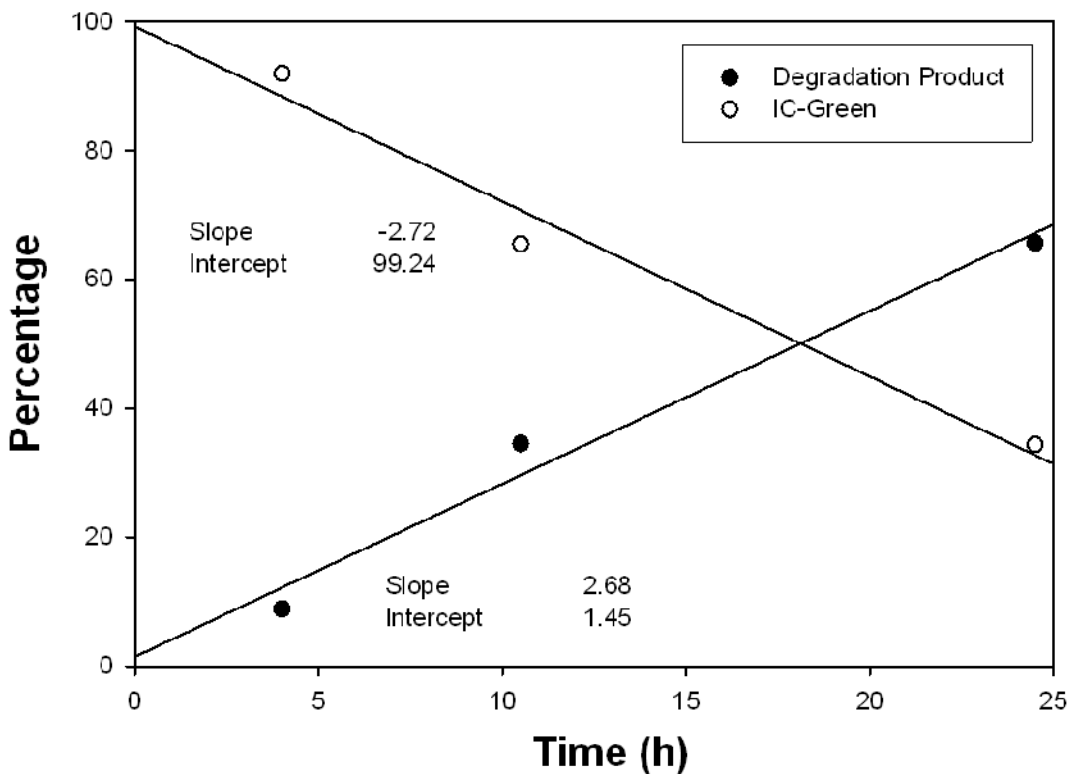

Supplemental Figure 1: An HPLC stability study of ICG in saline over a 25 hour period shows that ICG is unstable and rapidly forms degradation product.
